# Supplementary material for: Using the Maize Nested Association Mapping (NAM) Population to Partition Arbuscular Mycorrhizal Effects on Drought Stress Tolerance into Hormonal and Hydraulic Components
Source: MDPI journal article supplement (doi:10.3390/ijms23179822), 2022-08-29

**Figure S2:** Relative gene expression in eight maize aquaporin genes (*ZmPIP1;1*, *ZmPIP1;3*, *ZmPIP2;2*, *ZmPIP2;4*, *ZmTIP1;1*, *ZmTIP2;3*, *ZmTIP4;1* and *ZmNIP2;1*) in six maize NAM lines (B73, Ky21, NC350, Tzi8, Ms71 and Mo18W) selected from experiment 1 and inoculated or not with an arbuscular mycorrhizal (AM) fungus. Plants were cultivated under well-watered conditions or subjected to drought stress. Data represents the means of 5 replicates  $\pm$  S.E.

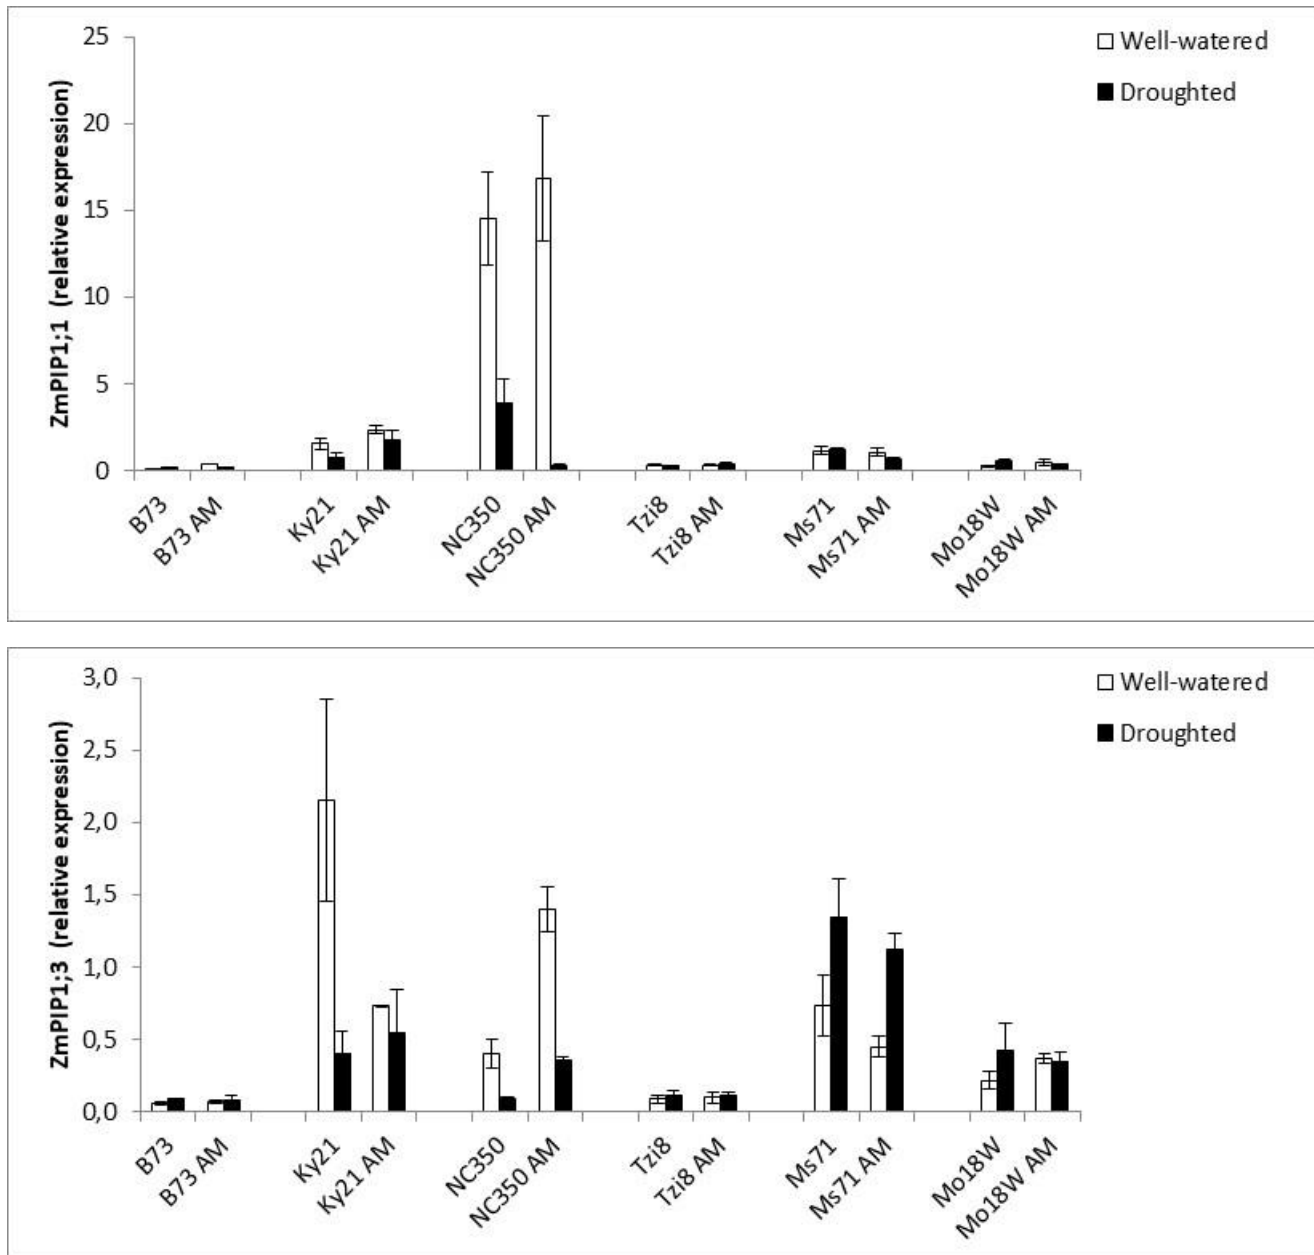

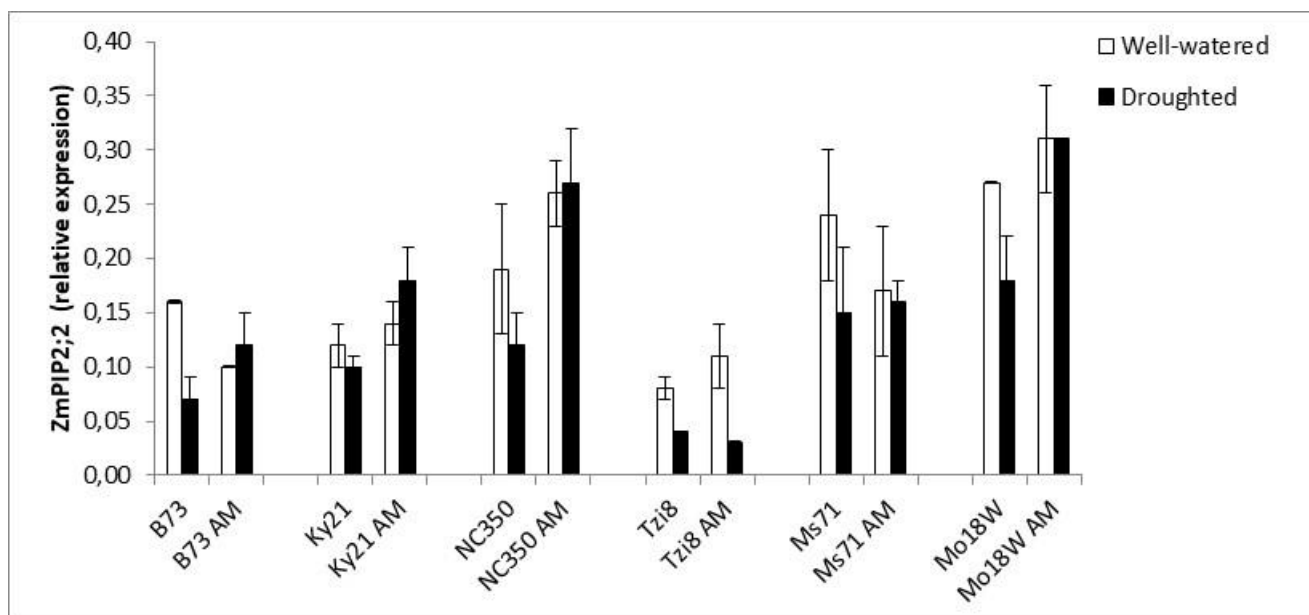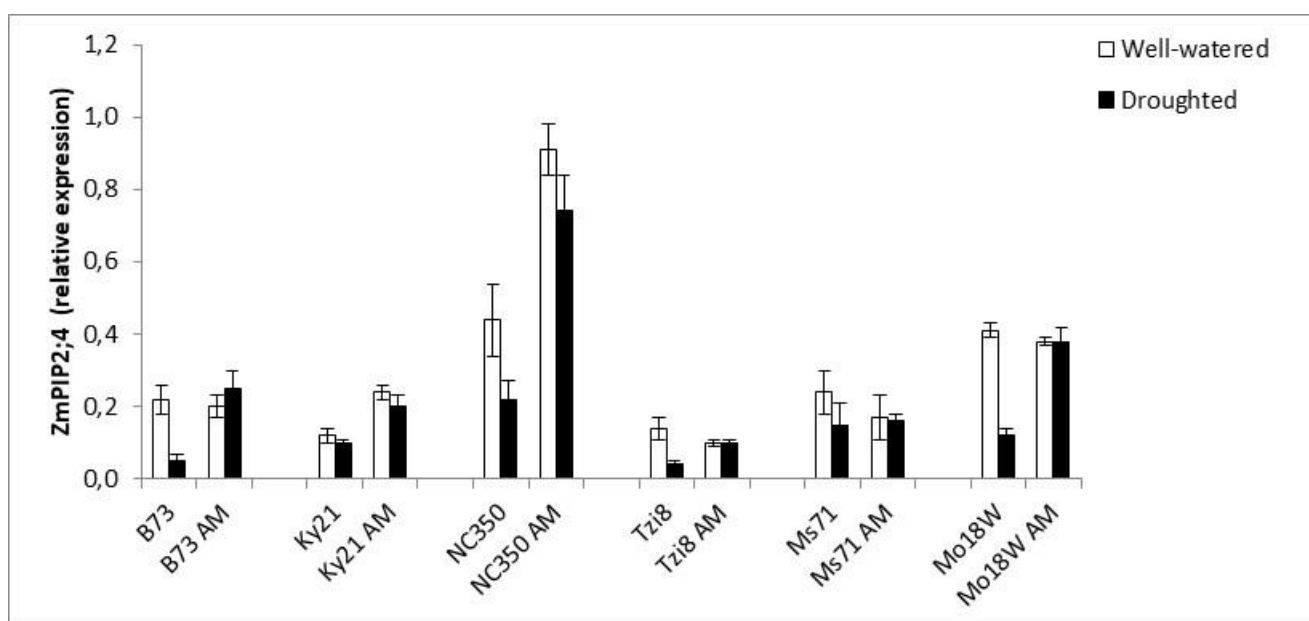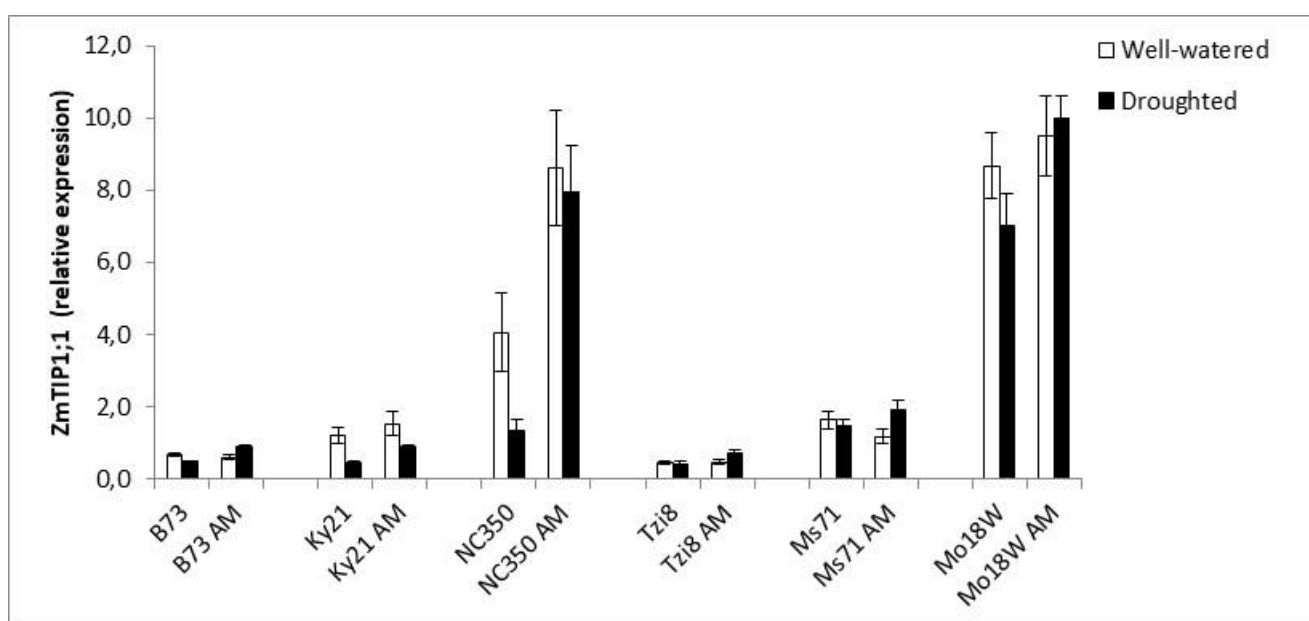

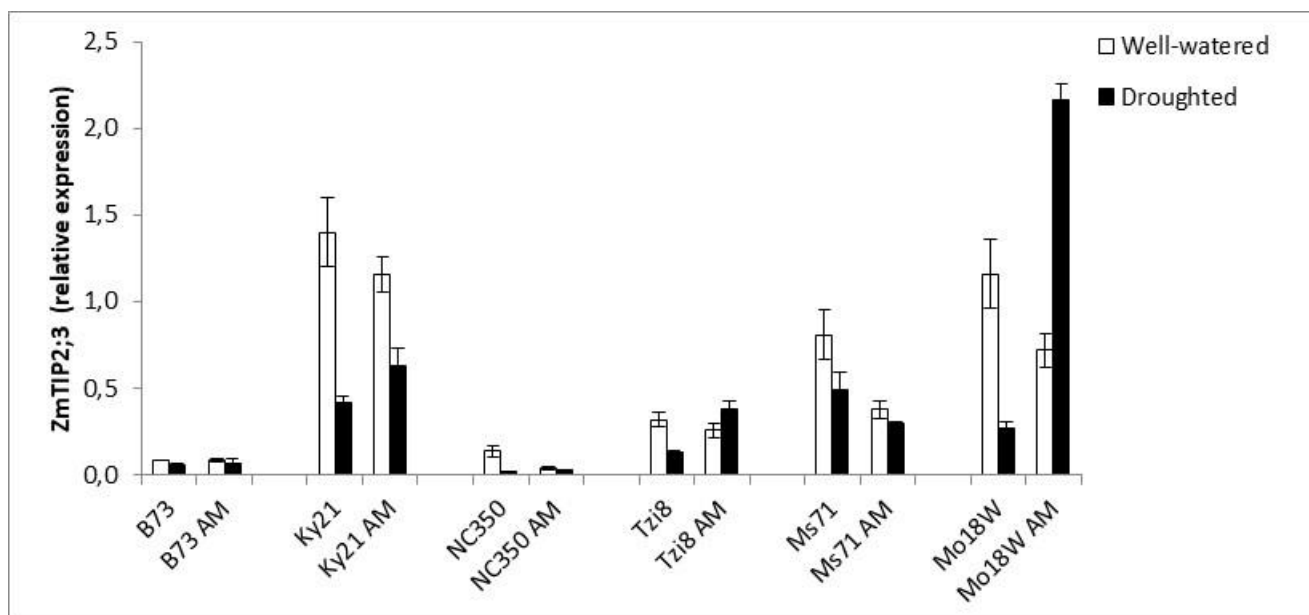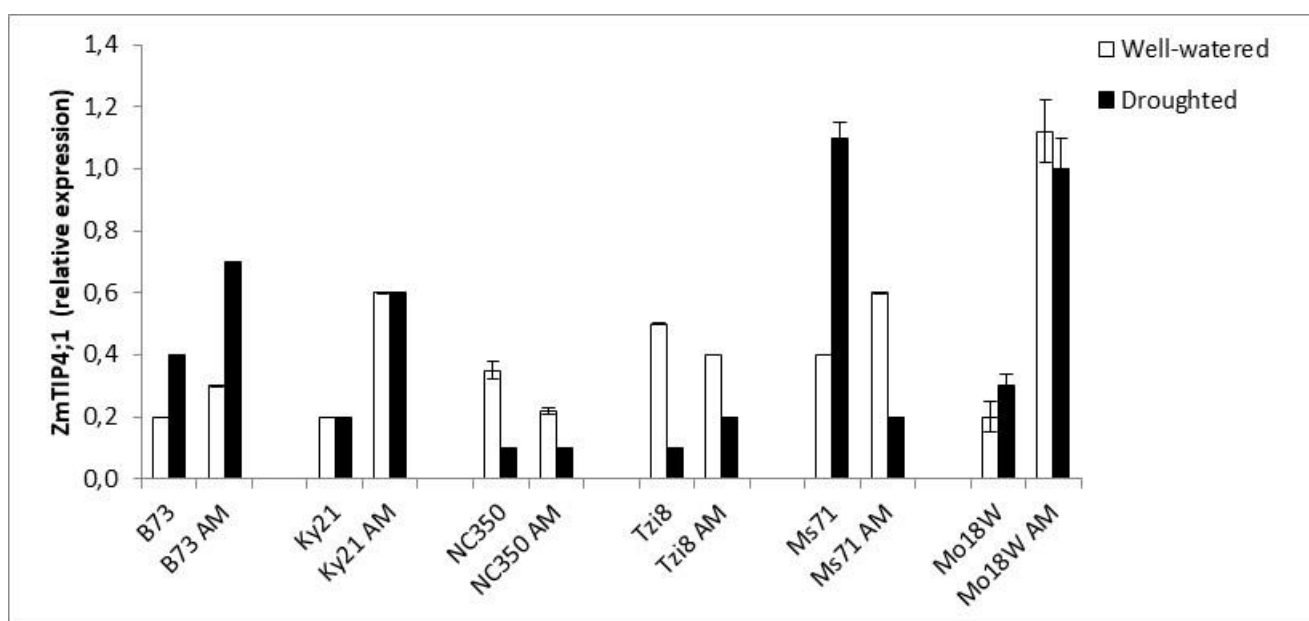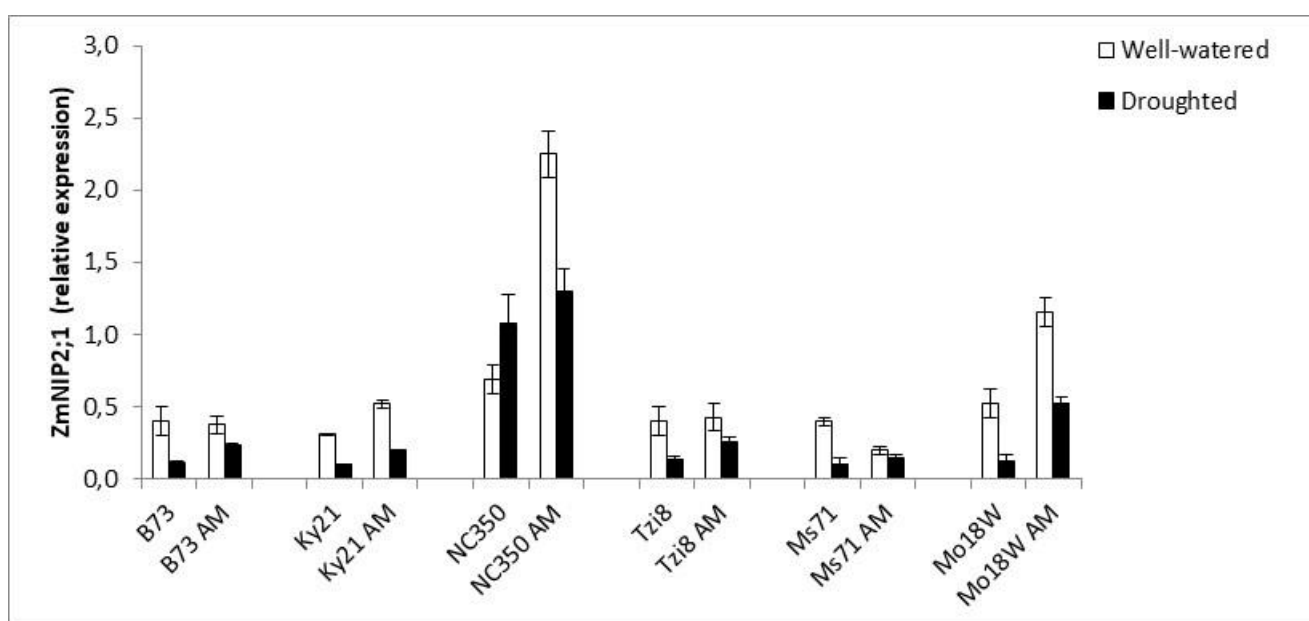

Supplement: s1 [file s1]
