# Supplementary material for: Using the Maize Nested Association Mapping (NAM) Population to Partition Arbuscular Mycorrhizal Effects on Drought Stress Tolerance into Hormonal and Hydraulic Components
Source: MDPI journal article supplement (doi:10.3390/ijms23179822), 2022-08-29

**Figure S1.** Sap hormonal content (ABA, IAA, SA, JA and JA-Ile) in the whole maize NAM population cultivated under well-watered conditions or subjected to drought stress. Data represents the means of 6 values  $\pm$  S.E.

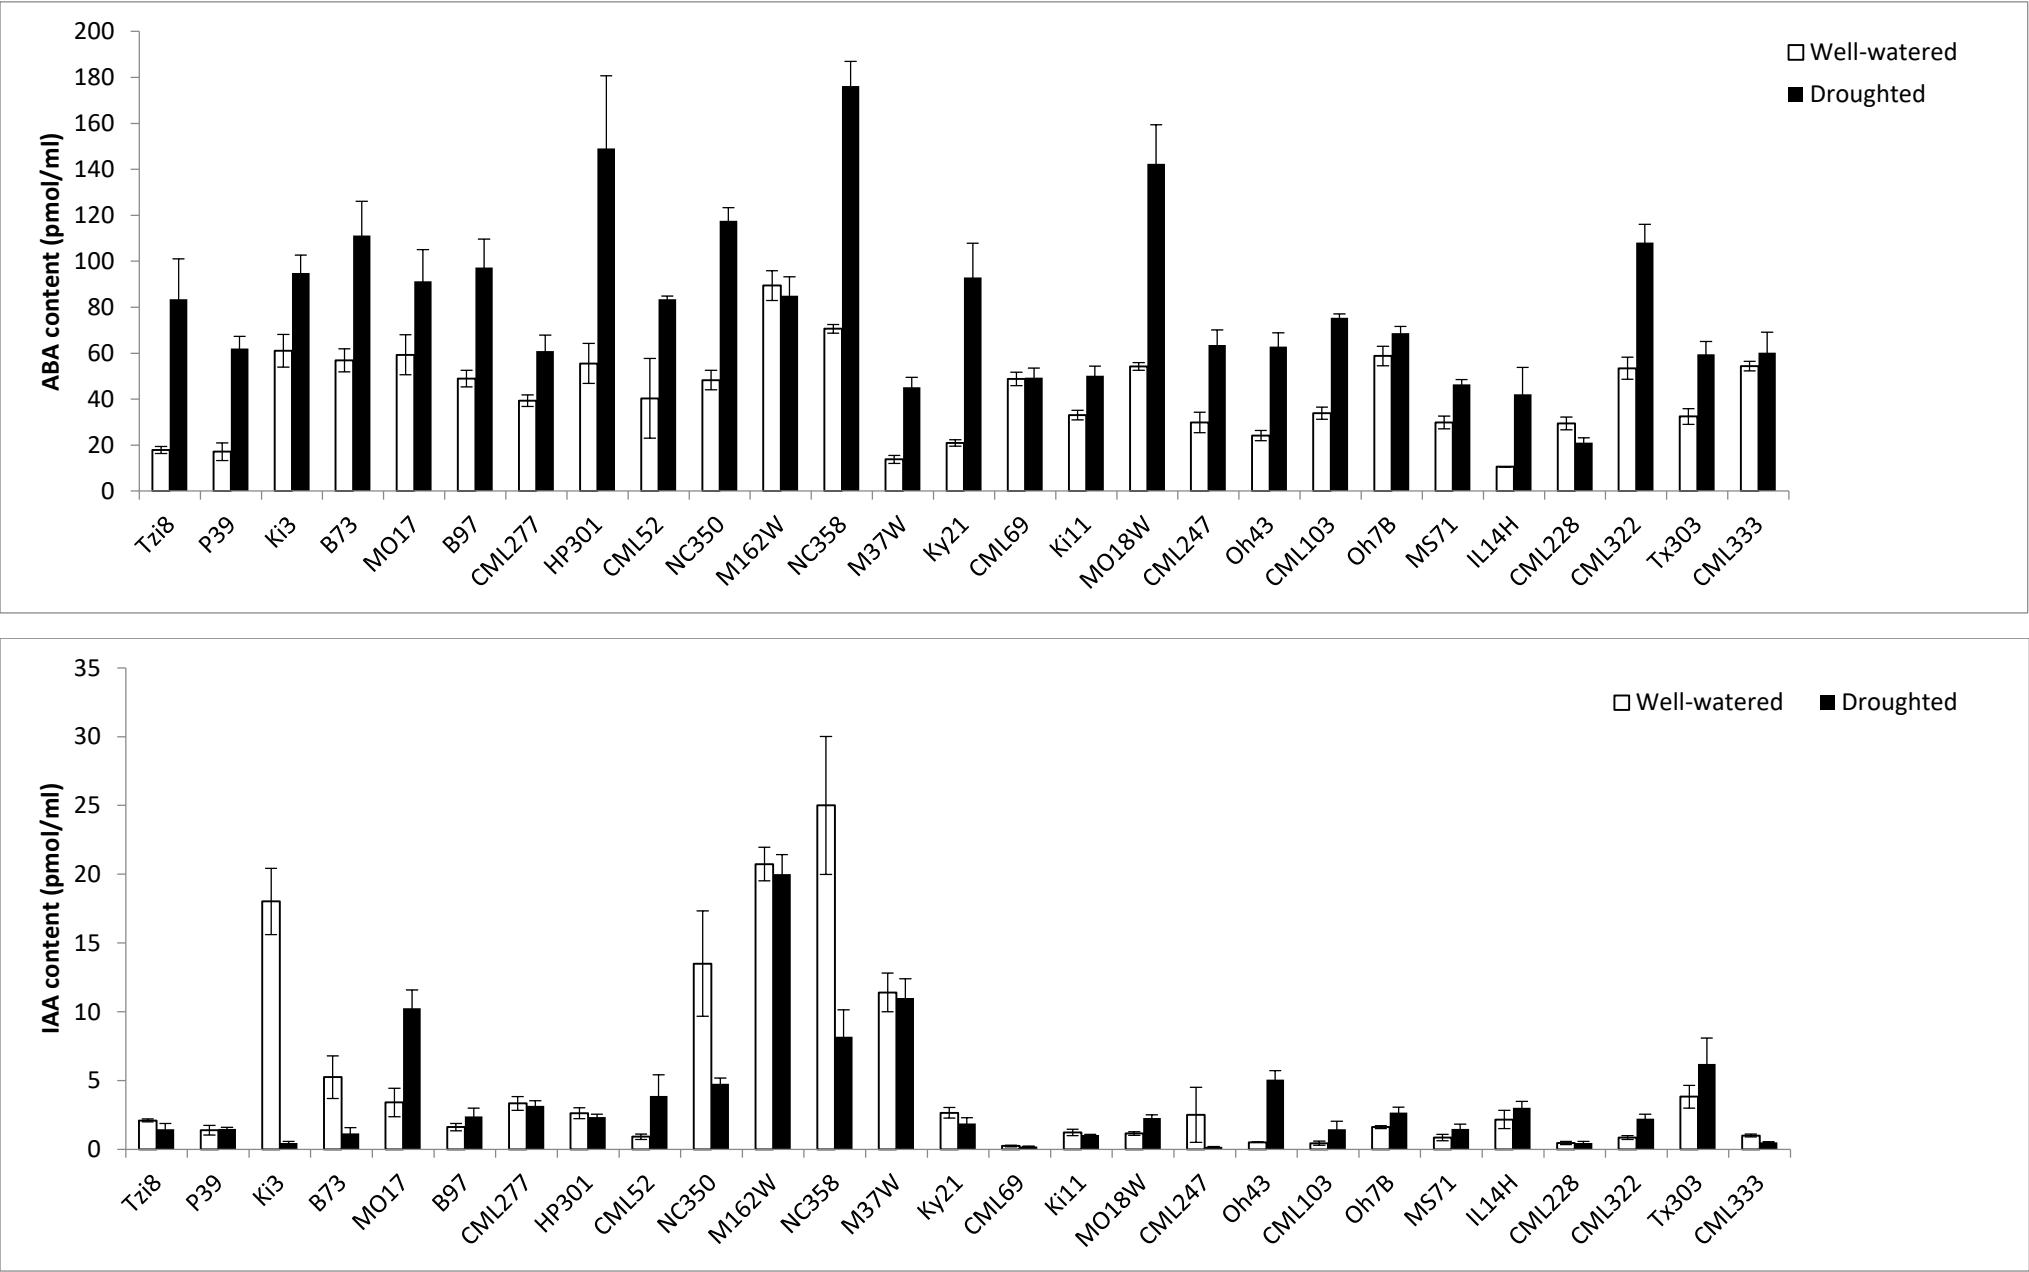

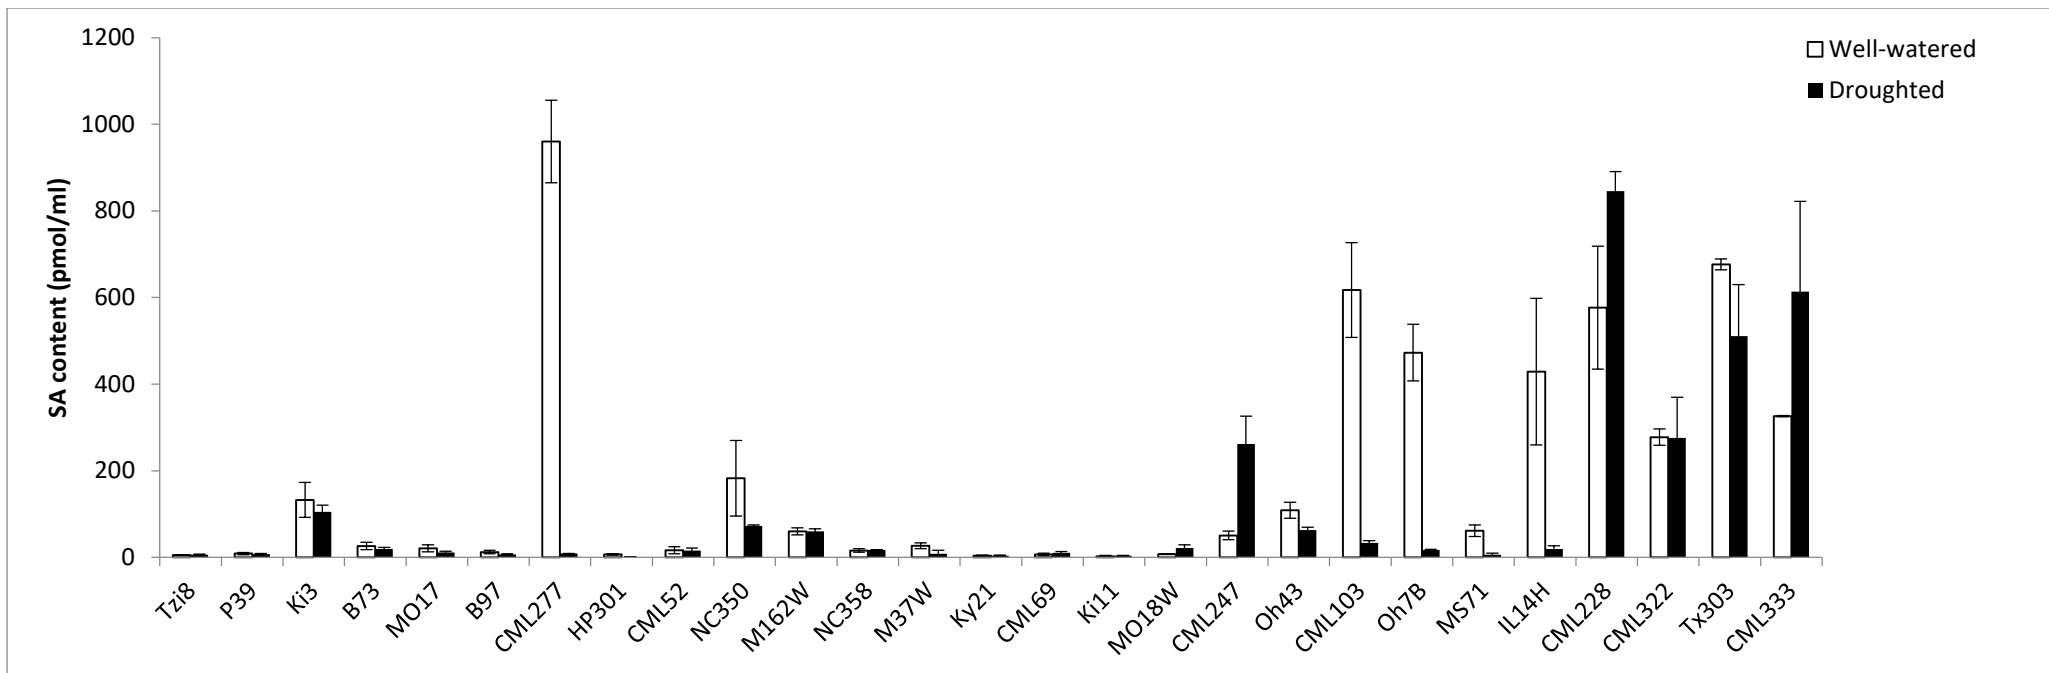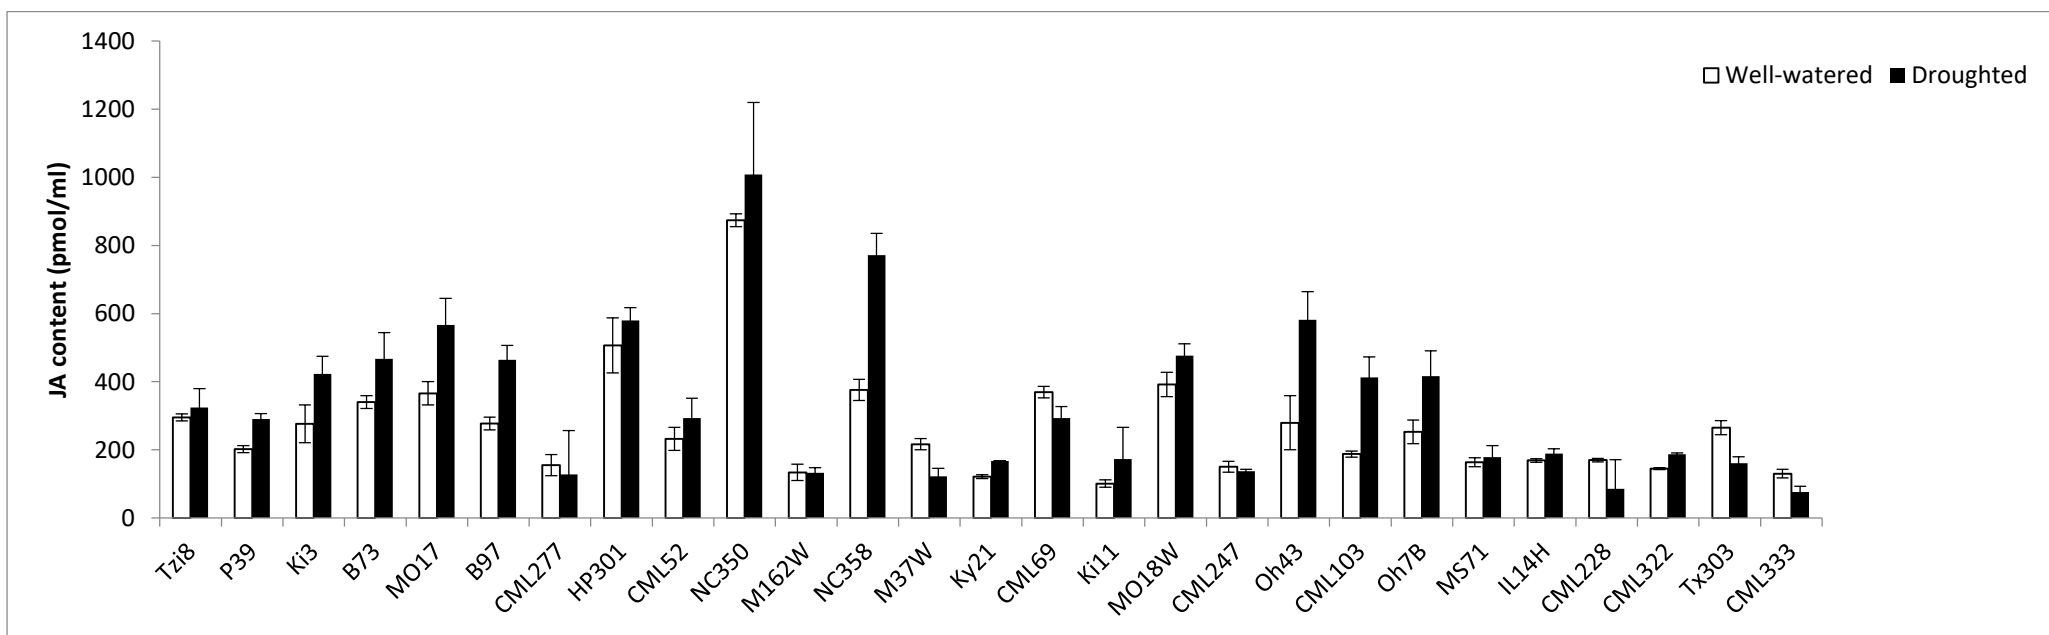

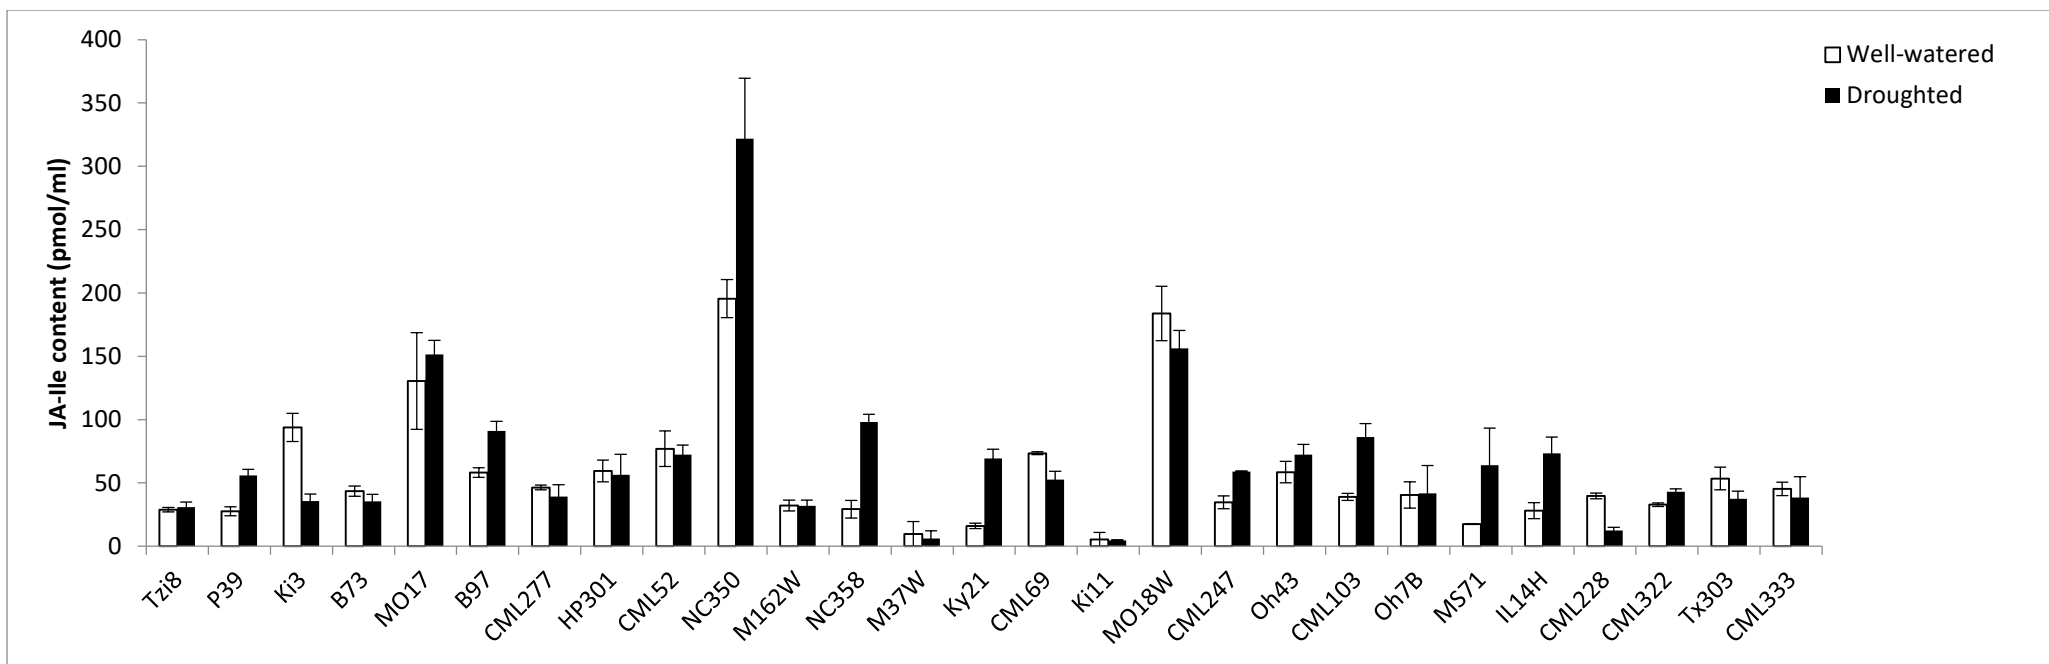

Supplement: s1 [file s1]
