# Supplementary material for: Using the Maize Nested Association Mapping (NAM) Population to Partition Arbuscular Mycorrhizal Effects on Drought Stress Tolerance into Hormonal and Hydraulic Components
Source: Int J Mol Sci. 2022 Aug 29;23(17):9822. doi: 10.3390/ijms23179822 (PMC9456450; doi:10.3390/ijms23179822)
Supplement: Supplementary file 1 [file ijms-23-09822-s001.zip]

Archive with 4 entries (4 files):
- Figure Supplementary S1 hormones.pdf
- Figure Supplementary S2 aquaporines.pdf
- Figure Supplementary S3 hormones.pdf
- Figure Supplementary S4 AM colonization.pdf
